# Supplementary material for: Integration of Metabolome and Transcriptome Reveals the Relationship of Benzenoid–Phenylpropanoid Pigment and Aroma in Purple Tea Flowers
Source: Front Plant Sci. 2021 Nov 23;12:762330. doi: 10.3389/fpls.2021.762330 (PMC8649654; doi:10.3389/fpls.2021.762330)
Supplement: Supplementary file 2 [file Table_1.XLSX]

## Sheet: Volatile BPs
Table S1. Peak percentage of volatile BPs.
BPs	ZJ1	ZJ2	ZJ3	BT1	BT2	BT3
Bald	0	0	0	0	0	0
Balc	0	0	0	0	0	0
MeSA	3.72	3.6	4.62	4.7	3.31	2.87
AP	8.92	4.9	6.44	24.96	41.79	28.88
1-PE	0.56	0.46	0.53	0.9	0.86	0.98
2-PE	0	0	0	0.56	0.46	0.68

## Sheet: Anthocyanin
Table S2. Abundance of anthocyanins*.
Index	Compounds	ZJ1	ZJ2	ZJ3	BT1	BT2	BT3	cpd_ID
Zmmp003779	Petunidin-3-O-(6''-O-p-coumaroyl)rutinoside	0.21773	0.31525	0.30543	0.034876	0.027174	0.029052	--
Zmmp003478	Petunidin-3-O-(6''-O-p-coumaroyl)glucoside-5-O-rhamnoside	9e-06	9e-06	9e-06	0.021512	0.02425	0.031928	--
Lmtp003079	Peonidin-3-O-rutinoside	0.061385	0.049432	0.051822	0.012272	0.014294	0.016668	--
Zmmp003451	Cyanidin-3-O-(6''-O-p-coumaroyl)rutinoside-5-O-glucoside	0.21313	0.28622	0.27948	9e-06	9e-06	9e-06	C16292
CWJP001501	Cyanidin-3-O-caffeoylsophoroside	0.044304	0.022548	0.02969	9e-06	9e-06	9e-06	--
Lmcp004347	Cyanidin-3-O-(6''-O-caffeoyl-2''-O-xylosyl)glucoside	9e-06	9e-06	9e-06	0.84605	0.76536	0.74255	--
pme1793	Pelargonidin-3,5-O-diglucoside	0.80231	0.80782	0.79546	0.17691	0.24363	0.23925	C08725
Smsp001640	Petunidin-3-O-glucoside-O-arabinoside	16.24	17.009	16.949	6.7287	7.3965	7.2475	--
Lmpp003815	Petunidin-3-O-(6''-O-p-Coumaroyl)glucoside	5.0895	5.0073	5.4623	8.5637	9.3041	8.516	--
pmf0203	Peonidin-3-O-glucoside	0.12835	0.17759	0.12528	3.2325	3.7906	3.4979	C12141
pme1398	Delphinidin-3-O-glucoside (Mirtillin)	1.3444	2.1386	1.4604	53.273	57.123	57.885	C12138
Smlp002532	Cyanidin-3-O-arabinoside	0.046784	0.064583	0.055689	2.093	2.2717	2.4825	--
pme1773	Cyanidin-3-O-rutinoside (Keracyanin)	12.528	13.509	13.964	4.1418	5.2346	4.8347	C08620
Zmcp002924	Cyanidin-3-O-(2''-O-glucosyl)glucoside	15.106	16.791	14.89	10.325	11.535	12.274	C16306
pmf0027	Cyanidin-3-O-galactoside*	0.34992	0.57088	0.42016	11.343	13.209	12.847	C08647
pme1777	Cyanidin-3,5-O-diglucoside (Cyanin)	25.144	28.75	25.314	10.366	11.499	10.88	C08639
pmb0550	Cyanidin-3-O-glucoside (Kuromanin)	0.37841	0.56134	0.37691	11.625	13.688	13.478	C08604
pmb2957	Cyanidin-O-syringic acid	0.24346	0.4916	0.36504	12.81	16.493	14.136	--
Lmpp003789	Cyanidin-3-O-(6''-O-p-Coumaroyl)glucoside	4.397	4.3319	5.0496	16.602	14.302	17.707	C12095
pme3392	Pelargonidin-3-O-glucoside	9e-06	9e-06	9e-06	2.13	2.265	2.4336	C12137
*Note: the values need to be multiplied by 10e6.

## Sheet: TPM
Table S3. Expression levels of genes related to BPs.
Gene ID	Gene name or annotation	ZJ1	ZJ2	ZJ3	BT1	BT2	BT3
TEA024587	PAL	457.18	420.07	336.49	271.21	226.46	229.69
TEA014056	PAL	240.26	283.13	236.85	344.56	339.68	336.44
TEA014166	PAL	132.72	141.36	131.12	244.68	208.25	233.23
TEA023243	PAL	192.4	214.54	187.75	213.09	190.39	199.6
TEA003137	PAL	8.74	10.72	9.77	15.27	12.99	12.09
MSTRG.45154	PAL	0.37	0.45	0.4	0.25	0.73	0.48
TEA003374	PAL	29.22	48.76	39.95	11.64	11.6	13.66
TEA031746	4CL	2.56	2.14	2.39	0.7	0.49	0.64
TEA031627	4CL	2.13	2.34	3.07	8.72	9.47	8.72
TEA013037	4CL	0	0	0.03	0	0	0
TEA009431	4CL	39.01	46.33	48.22	36.1	35.4	36.3
TEA028833	4CL	6.22	7.22	6.07	4.92	5.32	5.2
TEA010681	4CL	59.11	83.31	93.79	70.82	99.18	115.76
TEA002100	4CL	0.11	0	0	0	0	0
TEA018045	4CL	35.94	43.26	46.21	31.63	31.81	33.66
TEA022274	4CL	0.36	0.55	0.56	0.53	0.68	0.77
MSTRG.36563	4CL	23.11	23.93	44.71	48.69	39.05	29.26
TEA019224	4CL	0	0	0	0	0	0
TEA024967	4CL	0	0	0	0	0	0
TEA006577	4CL	0	0	0	0	0	0
TEA012173	4CL	0	0	0	0	0	0
TEA034002	C4H, CYP73A	0.29	0.24	0.43	1.22	3.66	2.02
TEA016772	C4H, CYP73A	1.33	3.3	1.6	1	0.86	0.98
TEA014864	C4H, CYP73A	85.84	116.9	103.33	29.98	30.81	36.03
TEA034001	C4H, CYP73A	42.35	56.31	46.42	6.08	4.27	6.52
TEA018665	CHS	0	0	0	0	0.1	0
TEA034045	CHS	5.16	8.41	8.62	14.66	11.73	12.08
TEA023333	CHS	7.31	15.08	13.34	6.17	8.76	11.01
TEA034042	CHS	164.63	266.16	241.38	133.52	148.05	186.16
TEA034013	CHS	5.33	3.78	11.81	4.51	2.32	8.47
TEA034011	CHS	124.34	161.2	164.89	567.88	687.58	624.57
TEA034019	CHS	66.74	83.46	79.38	166.45	197.71	174.24
TEA023340	CHS	801.43	1036.43	956.98	313.17	320.36	357.8
TEA023331	CHS	0.72	1.37	2.11	0.22	0.31	0.38
TEA034046	CHS	0	0	0	0	0	0
TEA034043	CHS	0	0	0	0	0	0
TEA034014	CHS	0	0	0	0	0	0
TEA034044	CHS	0	0	0	0	0	0
TEA034041	CHS	0	0	0	0	0	0
TEA018689	CHI	1.26	0.8	1.48	0.74	0.64	1.53
TEA033023	CHI	4.45	6.73	7.48	7.27	9.43	8.73
TEA034003	CHI	22.61	30.85	32.12	17.42	18.03	18.84
TEA022023	CHI	0.29	0	0	0	0	0
TEA033031	CHI	540.21	684	739.2	451.64	511.68	519.68
TEA013101	CHI	45.27	51.39	56.55	36.66	39.35	43.36
TEA014874	CHI	0	0	0	0	0	0
TEA023790	F3H	45	62.9	63.22	51.75	49.37	61.47
MSTRG.48580	F3H	0.33	0.71	0.45	1.39	1.06	0.65
MSTRG.26259	FLS/F3H	156.97	222.43	201.13	46.99	53.73	62.45
TEA010326	FLS/F3H	1.21	2.27	2.29	7.53	7.06	13.48
TEA014951	FLS/F3H	1.5	1.84	1.44	3.75	4.58	3.84
TEA016602	FLS/F3H	145.28	191.31	195.38	165.62	173.84	181.85
TEA026443	FLS/F3H	0.04	0.05	0	0	0	0
TEA028622	FLS/F3H	0.04	0.19	0.22	0.16	0.59	0.77
MSTRG.48304	FLS/F3H	0	0	0	0	0	0
TEA019638	FLS/F3H	0	0	0	0	0	0
TEA010328	FLS	53.92	66.44	66.27	57.64	70.81	81.89
TEA016601	FLS	180.54	216.83	222.53	278.69	291.3	250.18
TEA006643	FLS	359.65	429.07	435.08	94.38	99.95	102.77
TEA034025	FLS	0	3.78	0	0.41	0	0.2
TEA032730	DFR	42.96	53.12	60.61	53.26	57.16	51.34
TEA003656	DFR	9.01	11.96	13.67	17.69	18.53	18.34
TEA024762	DFR	13.21	15.47	17.65	0.94	0.6	0.4
TEA010588	DFR	0.15	0.04	0	0.1	0.19	0.05
TEA023829	DFR	0.32	0.49	0.39	0.75	2.02	1.47
TEA021807	DFR/F4R	0	0	0	0	0.07	0
TEA022775	DFR	0.25	0.33	0.46	0.09	0.18	0.09
TEA024758	DFR	9.17	7.57	7.38	2.88	2.07	1.91
TEA034018	DFR	0	0	0	0	0	0
TEA010322	ANS	9.96	16.68	16.09	9.86	7.56	10.4
TEA015769	ANS	0.09	0.3	0.12	0.07	0.03	0.04
TEA015762	ANS	0	0	0	0	0	0
TEA009266	ANR	15.62	17.66	22.02	1.34	1.42	2.65
TEA022960	ANR	18.79	24.85	31.7	3.68	3.03	4.89
MSTRG.14904	ANR	0.43	0	0.15	0	0	0
TEA027582	LAR	42.8	55.71	60.21	12.54	12.24	18.89
TEA021535	LAR	15.99	19.85	17.74	33.31	36.89	32.13
TEA026458	LAR	1.71	2.42	3.89	0.82	1.02	0.91
MSTRG.40353	LAR	0	0.17	0.6	1.84	1.76	1.84
MSTRG.2054	F3'5'H	16.72	17.84	14.95	230.57	217.11	199.22
TEA029842	F3'5'H	0	0	0	0.04	0.03	0.19
TEA026296	F3'5'H	4.41	4.62	5.18	3.34	3.43	3.29
TEA034021	F3'5'H	0	6.22	0	0	0	0
TEA014658	F3'5'H	0	0.16	0	0.17	0.15	0.2
TEA013315	F3'5'H	0.76	1.57	1.62	0.37	0.22	0.31
TEA030062	F3'5'H	3.79	4.66	5.72	1.09	2.06	2.11
TEA033562	F3'5'H	0	0	0.03	0.04	0.05	0.13
MSTRG.19067	F3'5'H	0.05	0	0	0	2.71	5.48
TEA003805	F3'5'H	0	0	0	0	0	0
TEA029292	F3'5'H	0	0	0	0	0	0
TEA026294	F3'5'H	0	0	0	0	0	0
TEA003798	F3'5'H	0	0	0	0	0	0
TEA034051	F3'5'H	0	0	0	0	0	0
TEA030096	F3'5'H	0	0	0	0	0	0
TEA016716	F3'H	2215.06	2174.88	2102.28	4001.67	3738.7	3151.62
MSTRG.630	F3'H	20.87	16.7	16.96	1187.06	1123.69	838.63
TEA016718	F3'H	1012.99	927.39	935.83	266.58	234.22	175.26
TEA006847	F3'H	50.37	80.29	70.46	150.44	165.92	185.6
TEA010133	F3'H	83.43	103.95	94.78	93.57	105.04	120.44
MSTRG.628	F3'H	0.4	0.39	0.26	9.7	10.36	8.2
TEA032807	UFGT	0.06	0.03	0.03	0.22	0.12	0.35
TEA022725	UFGT	0.61	1.87	1.23	1.51	2.26	2.4
TEA027081	UFGT	0	0	0	0	0	0
TEA002973	UFGT	0	0	0.11	0.05	0	0.28
TEA007509	UFGT	23.11	24.62	24.04	14.15	16.23	20.65
TEA022548	UFGT	0.25	1.12	0.4	5.04	4.09	8.03
TEA022583	UFGT	0.38	0.27	0.56	0.1	0	0
MSTRG.28404	UFGT	9.99	11.12	8.14	6.81	6.03	7.22
TEA008907	BZ1	0.29	0.33	0.54	3.32	3.05	3.83
TEA006104	BZ1	0	0	0.27	0	0.25	0
TEA012191	BZ1	8.09	14.18	10.12	31.48	40.34	33.33
TEA006103	BZ1	0.3	0.26	0.16	0.39	0.3	0.7
TEA001347	BZ1	0.62	0.71	0.54	2.69	2.61	3.32
TEA008918	BZ1	4.49	3.59	2.99	20.29	28.64	22.6
TEA008906	BZ1	2.2	3.72	2.85	12.41	14.64	15.91
MSTRG.28404	BZ1	9.99	11.12	8.14	6.81	6.03	7.22
MSTRG.30025	BZ1	0	0	0	0	0.2	0
MSTRG.26146	BZ1	0.36	0.1	0.85	1.51	1.96	1.06
TEA013339	BPBT	45.65	55	51.78	35.99	43.41	53.78
MSTRG.24286	BPBT	0	0	2.06	11.85	14.2	5.38
TEA029770	BPBT	0	0	0	0	0	0
MSTRG.19576	SAMT	48.88	49.72	47.58	155.07	146.68	125.3
TEA032708	SAMT	77.18	68.72	67.06	323.96	282.92	252.11
MSTRG.42842	SAMT	0.45	0.81	1.59	0.22	0.3	0.2
MSTRG.40656	SAMT	1.35	0.5	1.01	0.68	3.12	0.25
MSTRG.19577	SAMT	0	0	0	0	0	0
TEA005549	PAR	1.89	1.79	1.69	9.87	8.15	8.49
MSTRG.26274	PAR	0	0	0	0.17	0.07	0.26
TEA001641	SDR	0	0	0	0	0	0
TEA029207	SDR	0	0	0	0	0	0
TEA003251	SDR	0	0	0	0	0	0
TEA019575	SDR	0	0	0	0	0	0
TEA007416	SDR	0	0	0	0	0	0
TEA000586	SDR	0	0	0	0	0	0
TEA027148	SDR	0	0	0	0	0	0
TEA021315	SDR	0	0	0	0	0	0
TEA005180	SDR	0	0	0	0	0	0
TEA031338	SDR	3.87	4.84	4.2	5.48	4.74	3.81
MSTRG.13742	SDR	7.8	8.98	8.27	8.51	7.9	7.46
TEA023882	SDR	2.08	2.46	2.07	2.43	2.68	2.08
TEA016394	SDR	0.7	1.63	1.66	1.93	1.39	1.63
TEA026238	SDR	0.14	0.08	0	0.13	0.42	0.02
TEA002466	SDR	0	0	0	0	0	0.05
MSTRG.5	SDR	0	0.39	0	0	0	0
TEA016897	SDR	2.51	1.98	3.95	3.08	3.65	4.51
MSTRG.4461	SDR	16.02	17.13	23.9	24.87	23.05	21.46
MSTRG.12806	SDR	7.15	5.69	1.47	10.89	12.85	4.61
TEA020465	SDR	0.06	0.29	0.22	0.33	2.48	5.11
MSTRG.13060	SDR	0	0	0	0	1.14	1.75
TEA033224	SDR	23.44	26.23	32.13	22.39	23.06	21.05
TEA025281	SDR	105.12	133.7	134.95	167.8	167.81	168.59
TEA028837	SDR	71.5	79.49	89.15	48.14	53.22	51.32
TEA020001	SDR	6.78	8.16	9.51	26.34	30.03	26.64
TEA020471	SDR	15.29	20.05	20.17	22.92	27.63	25.41
TEA026230	SDR	15.72	18.36	19.23	24.34	24.65	25.75
TEA017032	SDR	6.98	8.65	10.09	23.35	24.46	24.18
TEA005168	SDR	12.36	11.73	13.57	14.05	13.52	14.4
MSTRG.4459	SDR	2.81	4.01	5.19	8.8	7.8	7.46
TEA033685	SDR	2.32	3.01	2.56	8.2	7.9	7.11
TEA032782	SDR	1.25	1.97	1.48	5.58	7.16	6.15
TEA009818	SDR	1.65	1.77	3.34	6.53	3.83	6.49
TEA016102	SDR	1.72	1.86	2.2	5.42	3.01	3.71
TEA006471	SDR	4.55	5.47	5.52	4.41	3.74	2.82
TEA033682	SDR	5.76	5.61	5.55	3.35	4.04	3.18
TEA031302	SDR	1.07	1.04	1.27	3.01	2.75	2.25
TEA017460	SDR	2.86	4.18	3.22	2.61	2.62	1.99
MSTRG.44615	SDR	0.83	1.41	1.42	1.94	2.87	1.93
MSTRG.6934	SDR	0	0	0	0.99	1.43	1.6
MSTRG.45034	SDR	0.13	0.15	0.09	1.14	0.72	1.36
TEA011276	SDR	4.82	3.61	3.61	0.63	0.96	0.69
MSTRG.29077	SDR	0.23	0.18	0.32	0.59	0.83	0.5
TEA005757	SDR	0.49	0.95	0.26	0.11	0.08	0.11
TEA007223	DAHPS	77.59	94.85	96.27	59.87	47.29	51.14
TEA006498	DAHPS	205.09	246.39	253.56	139.93	170.48	170.62
TEA028537	DAHPS	236.27	321.71	272.41	1233.09	1275.37	1276.74
MSTRG.26069	DAHPS	0.08	0.19	0.6	0.91	0.61	1.23
MSTRG.46339	DAHPS	0.57	0	0	0.56	0.8	0
MSTRG.40123	DAHPS	0.42	1.51	2.33	29.2	25.52	27.03
TEA000809	ADT	29.68	43.4	34.51	31.61	28.68	30.53
TEA026461	ADT	4.41	5.38	6.25	8.54	6.87	6.2
TEA007601	ADT	2.06	1.91	2.95	1.58	2.12	1.81
TEA022945	ADT	2.63	3.56	3.42	2.74	3.07	2.32
TEA007862	ADT	0	0	0.26	0	0	0
TEA001924	ADT	1.01	0.81	1.02	1.4	2.03	1.28
MSTRG.37010	ADT	0	0	0	0.28	0.32	1.57
MSTRG.4713	ADT	0.22	0.13	0.26	1.71	0.56	0.44
TEA010391	ADT	0.66	0.29	0.65	0	0.07	0
TEA001026	ADT	30.72	36.02	38.04	26.45	22.93	23.91
TEA015348	ADT	3.91	3.52	4.97	0.39	0.52	0.61
TEA033282	ADT	272.27	338.48	271.99	422.54	423.66	389.34
TEA033097	ADT	2.68	2.71	3.21	4.65	4.23	3.52
MSTRG.47766	ADT	0.31	0.11	0.06	7.81	7.88	7.97
TEA000856	MRP	13.26	18.91	17.29	18.02	19.67	22.39
TEA028975	MRP	0.04	0.05	0.05	0.01	0.04	0.1
TEA013531	MRP	23.87	27.66	27.4	35.16	36.5	35.83
TEA000859	MRP	5.19	6.41	5.71	10.53	8.82	10.05
TEA025951	MRP	7.06	8.89	9.58	4.25	3.63	4.78
TEA003320	MRP	1.43	1.99	2.18	3.18	2.67	3.94
TEA009543	MRP	0.86	1.48	1.52	3.88	2.12	3.77
TEA000854	MRP	1.15	1.2	1.76	2.91	3.3	3.41
TEA015341	GST	50.9	70.29	61.8	435.55	431.44	399.42
MSTRG.18289	GST	265.92	287.73	347.71	371.83	400.53	359.85
MSTRG.8813	GST	508.6	609.32	653.99	322.47	294.81	305.02
TEA029673	GST	11.29	26.64	13.48	168.71	145.41	162.72
TEA016195	GST	140.23	187.98	192.3	131.37	140.15	135.07
TEA017121	GST	22.18	43.46	40.33	101.77	102.99	104.33
TEA010988	GST	1.52	2.1	2.42	68.41	64.08	62.81
TEA002732	GST	11.51	13.18	12.91	34.63	42.41	36.81
TEA000595	GST	8.58	11.38	10.81	36.17	37.69	30.49
MSTRG.18266	GST	7.86	9.69	12.46	22.76	49.07	23.47
TEA014619	GST	12.26	21.23	16.55	30.45	34.1	26.85
TEA033741	GST	13.02	24.7	18.31	25.78	32.27	25.99
MSTRG.29906	GST	10.22	16.72	14.33	24.03	25.24	25.27
TEA013285	GST	68.39	90.53	104.64	20.87	26.34	25.36
TEA011797	GST	1.79	2.17	1.94	20.97	24.08	21.24
TEA025550	GST	10.92	13.18	13.08	18.36	19.74	23.07
TEA021770	GST	85.82	124.23	128.22	18.5	21.28	20.82
TEA015778	GST	5.68	11.13	6.15	18.09	22.86	18.02
TEA010121	GST	1.45	3.27	1.66	11.74	11.18	31.58
TEA023503	GST	49.55	66.82	61.44	16.64	17.7	17.6
MSTRG.13208	GST	3.38	6.78	5.84	13.67	17.23	19.3
TEA032624	GST	49.63	59.35	79.95	9.88	15.01	16.26
TEA017752	GST	19.12	20.7	32.27	11.58	18.78	9.96
TEA014634	GST	2.82	4.66	4.87	11.78	13.94	10.99
MSTRG.4939	GST	34.1	34.86	44.87	13.59	14.73	6.36
TEA024657	GST	4.55	7.44	5.62	10.44	10.34	11.53
TEA033769	GST	13.21	19.89	18.91	8.8	10.7	10.07
TEA010512	GST	3.49	4.67	5.75	9.78	8.92	8.86
TEA033761	GST	7.94	12.34	11.41	6.8	6.71	8.03
TEA006024	GST	9.69	8.79	11.72	5.89	7.24	7.16
TEA032216	GST	18.17	29.44	30.84	13.16	2.9	3.53
TEA017753	GST	2.07	2.78	1.87	6.69	5.43	4.73
MSTRG.17788	GST	0.12	0.23	0	7.07	5.55	4.11
TEA016191	GST	0	0	0.21	2.77	3.24	8.65
TEA003280	GST	2.13	2	3.12	3.44	5.17	3.3
MSTRG.42718	GST	0	0	0	2.43	3.82	2.67
MSTRG.49357	GST	0.47	1.82	1.64	2.62	3.25	3.03
TEA010451	GST	0.13	0.32	0.37	2.52	2.73	3.02
MSTRG.40089	GST	0.09	0.1	0.09	1.39	3.2	3.18
MSTRG.29872	GST	0	0	0	0.72	3.14	3.85
MSTRG.42254	GST	0	0	1.22	1.55	3.2	2.92
TEA006026	GST	6.12	8.04	7.84	4.78	1.75	0.6
TEA000511	GST	0.72	0.59	0.83	1.48	1.58	3.15
TEA000598	GST	30.79	39.1	39.85	2.23	1.81	2.16
MSTRG.47876	GST	3.4	4.32	3.51	2.09	1.59	0.9
TEA025153	GST	0.3	0.64	0.27	0.52	1.67	1.93
TEA014504	GST	0.66	0.76	0.45	1.34	1.56	1.12
TEA000526	GST	0.32	0.32	0.19	1.21	0.77	1.98
TEA019073	GST	0.32	0.28	0.42	1.67	0.96	1.06
TEA022693	GST	0	0	0	1.08	0.85	0.57
TEA033753	GST	2.09	2.68	2.32	0.53	0.7	0.92
MSTRG.8815	GST	1.41	1.06	1.75	0.5	0.51	0.84
MSTRG.42273	GST	0	0.21	0	0.23	0.43	0.8
MSTRG.49358	GST	2.81	4.15	6.06	0.73	0.1	0.41
MSTRG.616	GST	0.11	0.18	0	0.34	0.55	0.3
MSTRG.10218	GST	6.6	11.02	6.06	0	0	0.85
TEA006029	GST	1.98	4.51	1.48	0	0.26	0.34
TEA025564	GST	0.36	0.51	0.52	0.35	0	0.12
TEA033763	GST	3.24	4.53	6.31	0.1	0.25	0
TEA006830	GST	0.09	0.3	0.18	0	0	0
MSTRG.49354	GST	1.05	1.37	0.44	0	0	0
TEA006958	MATE	237.47	295.32	314.51	906.3	799.94	1640.4
TEA012319	MATE	52.46	80.89	74.17	174.13	178.29	178.34
TEA020129	MATE	15.86	19.97	18.63	75.12	67.33	66.55
TEA027806	MATE	57.26	74.15	73.86	42.95	46.75	44.13
TEA020714	MATE	69.52	82.7	80.01	36.82	33.5	35.2
TEA027950	MATE	5.61	2.73	14.03	37.04	20.06	24.91
TEA012324	MATE	114.04	130.5	133.73	16.31	33.64	27.8
TEA017874	MATE	17.79	24.42	20	12.16	15.95	12.42
TEA032604	MATE	0.88	2.57	2.89	13.83	10.76	9.27
MSTRG.32164	MATE	61.66	75.02	64.9	13.08	8.9	11.14
TEA006173	MATE	1.87	3.85	3.3	9.17	8.7	7.81
TEA024381	MATE	19.49	25.89	30.1	5.49	6.28	8.77
TEA024498	MATE	0.72	0.8	1	2.98	4.24	9.88
TEA005387	MATE	1.37	1.8	1.61	5.45	5.27	5.93
TEA027663	MATE	3.48	4.14	4.14	5.6	5.43	4.81
TEA031417	MATE	6.62	10.9	9.95	3.71	4.95	6.35
TEA025406	MATE	4.98	5.68	6.3	3.92	4.11	3.97
TEA033502	MATE	0.35	0.78	0.78	3.38	3.39	4.94
MSTRG.48344	MATE	17.26	20.07	20.24	3.52	2.17	3.59
TEA029282	MATE	0.27	0.38	0.3	2.35	2.72	3.19
TEA002881	MATE	1	1.44	1.47	2.5	2.42	2.85
TEA017709	MATE	22.87	26.78	29.01	1.69	2.92	1.65
TEA019743	MATE	0.76	0.88	0.72	2.7	1.86	1.69
TEA020838	MATE	3	3.19	3.02	1.09	1.24	1.13
MSTRG.49126	MATE	0	0.27	0	1.18	0.86	0.86
TEA027941	MATE	24.97	30.06	30.14	0.95	0.75	1.19
TEA026229	MATE	0.45	0.31	0.25	0.48	1.1	0.81
TEA008938	MATE	0.11	0.27	0.29	0.43	1.04	0.88
MSTRG.9422	MATE	20.57	24.81	24.46	0.49	0.8	0.66
MSTRG.9423	MATE	14.92	23.76	20.18	0.54	0.33	0.95
TEA033503	MATE	1.29	1.9	1.82	0.62	0.49	0.43
TEA017384	MATE	0.66	1	1.04	0.51	0.36	0.47
TEA007867	MATE	1.31	0.82	0.74	0.13	0.55	0.29
TEA027938	MATE	0.55	0.43	0.58	0.39	0.23	0.22
TEA023515	MATE	0.1	0	0.07	0.37	0.17	0.29
TEA029367	MATE	0.03	0	0.06	0.33	0.31	0.18
TEA020836	MATE	0.7	0.56	0.55	0	0	0.41
TEA017172	MATE	0.03	0	0	0.12	0.05	0.24
TEA029389	MATE	1.22	1.83	1.9	0	0.2	0.08
MSTRG.44120	MATE	1.27	2.37	2.42	0	0	0
MSTRG.40354	MATE	1.34	0.57	0.46	0	0	0
MSTRG.28161	NAC transcription factor 29-like [Camellia sinensis]	0	0	0	3.79	6.17	4.89
TEA012360	WRKY transcription factor 40 [Actinidia chinensis var. chinensis]	0.14	0.26	0.19	1.13	1.66	1.15
TEA004341	PREDICTED: ethylene-responsive transcription factor ERF118-like [Nicotiana sylvestris]	4.16	4.84	4.28	7.7	10.2	8.86
TEA000588	heat stress transcription factor B-3-like isoform X1 [Quercus suber]	1.01	1.1	1.05	1.74	2.02	1.63
TEA024999	PREDICTED: myb family transcription factor PHL5 isoform X1 [Vitis vinifera]	0.74	1.04	0.94	2.23	2.84	2.33
MSTRG.43318	MYB-like transcription factor ETC3 [Camellia sinensis]	4.7	4.75	3.69	14.58	17.25	14.11
TEA014041	PREDICTED: transcription factor TGA2.3 [Vitis vinifera]	0.59	0.57	0.85	1.34	1.77	1.53
TEA030964	transcription factor APETALA2 [Camellia sinensis]	8.91	10.85	9.92	23.54	27.53	21.26
TEA009154	PREDICTED: transcription factor TCP4 [Glycine max]	1.84	3.98	3.74	12.62	17.76	15.99
TEA027958	GATA transcription factor [Actinidia chinensis var. chinensis]	0	0	0	0.33	0.39	0.34
MSTRG.32209	transcription factor EMB1444-like [Camellia sinensis]	0	0	0	1.64	1.88	1.39
TEA032800	bZIP transcription factor 18 [Camellia sinensis]	11.28	12.42	13.68	18.88	21.4	18.99
TEA022802	PREDICTED: GATA transcription factor 26-like [Nicotiana tabacum]	2.2	1.3	2.92	13.88	15.8	10.92
TEA002399	Transcription factor like [Actinidia chinensis var. chinensis]	7.06	7.98	8.18	25.13	28.35	26.72

## Sheet: Primer
Table S4. Primers for real-time PCR.
Category	Gene_ID	Primer_name	Primer_sequence
Upstream	TEA028537	DAHPS-F	GTGACAGAGTGCATTGGTGG
		DAHPS-R	GAATTCTGTGATCCGAGCCG
	TEA033282	ADT-F	TCGGTGCTCTTTAAGGTGCT
		ADT-R	AGTGAACTCCTGAACCTCCG
Volatile BPs	MSTRG.24286 (XM_028250296.1)	BPBT-F	GGCATCTTCAACTCTTCCCC
		BPBT-R	ATCACACTCGCAGGGTCTTT
	TEA032708	SAMT-F	GTGGCTCTCTCAGGTACCAG
		SAMT-R	CTCCGCTCACCAATTCCTCT
	TEA005549	PAR-F	TTTGGTGGAGAGAATGGCAC
		PAR-R	TGAAGTCGATGCCCAATGTT
	TEA025281	SDR-F	CAGTCAACTCAGTGCATCCTG
		SDR-R	TCCAGTCACACCTTTCAGCT
Non-volatile BPs	TEA014864	C4H-F	TTTGGTGTCGGAAGGAGGAG
		C4H-R	TATGCAAGCTGAACTGTCCC
	TEA010322	ANS-F	TTCTACGAGGGCAAATGGGT
		ANS-R	GCCCACGAAATCCTCACTTT
	TEA006643	FLS-F	TGTTCTTCACAGGAGTTTGGTG
		FLS-R	CGGTACTCAGCATATGTTTTGGT
	TEA027582	LAR-F	TCGTTGCATCGTTCACACAC
		LAR-R	GCAGTGTTTCCATCCGTCTC
	MSTRG.2054 (XM_028271861.1)	F3'5'H-F	ACAGAAGCAGATGAAGGGGT
		F3'5'H-R	TCTCCGTCGTCTTTCAGCTT
	TEA012191	BZ1-F	GTGATGGAGTTCGGAATGGC
		BZ1-R	CCTGCTCTTCTCGCTCATCT
Transportation	TEA015341	GST-F	GCTGTGAGGACAAGCTTGAG
		GST-R	TAACCAAGTGTCCAAGCCCA
	TEA013531	MRP-F	CTTTCGCTGCTCCCATTGTT
		MRP-R	GCCATTCTAGCATTGTCCCG
Reference gene	TEA019484	ACT2-F	GCCATCTTTGATTGGAATGG
		ACT2-R	GGTGCCACAACCTTGATCTT
